# Supplementary material
Source: PubMed Central journal article supplement (PMC3236117)
Supplement: supp_blood-2011-04-347559_TableS1.pdf [file supp_blood-2011-04-347559_TableS1.pdf]

**Autoimmune Diseases****Infections****Inflammatory Conditions*****Autoantibodies Detectable***

Systemic involvement  
Rheumatoid arthritis  
Systemic sclerosis  
Sjögren's syndrome  
Systemic lupus erythematosus  
Polymyositis or dermatomyositis  
Organ involvement  
Hashimoto thyroiditis  
Graves disease  
Addison disease  
Pernicious anemia  
Autoimmune hemolytic anemia  
Immune thrombocytopenia  
Primary biliary cirrhosis  
Discoid lupus erythematosus  
Localized scleroderma  
Myasthenia gravis  
Autoimmune hepatitis  
Polyarteritis nodosa  
Guillain-Barré syndrome  
Diabetes type 1  
Lupoid hepatitis  
Celiac disease  
Wegener granulomatosis  
Dressler syndrome  
Chronic rheumatic heart disease  
Multiple sclerosis  
Amyotrophic lateral sclerosis

Pneumonia  
Tuberculosis  
Intestinal infection  
Rickettsiosis  
Syphilis  
Gonorrhea  
Chlamydia  
Septicemia  
Herpes simplex  
Herpes zoster  
Viral hepatitis A  
Viral hepatitis B  
Viral hepatitis C  
Infectious mononucleosis  
Pyelonephritis  
Cystitis  
Sinusitis  
Otitis media  
Rhinitis  
Nasopharyngitis/laryngitis  
Influenza  
Encephalitis  
Malaria  
Meningitis  
Lyme disease  
Pericarditis  
Myocarditis  
Endocarditis  
Osteomyelitis  
Cytomegalovirus  
Epstein-Barr virus  
Helicobacter pylori  
HIV  
Gingivitis or periodontitis  
Tonsillitis  
Empyema  
Erysipelas (cellulitis)  
Fasciitis

Chronic bronchitis  
Nephrotic syndrome  
Chronic glomerulonephritis  
Chronic prostatitis  
Dermatitis herpetiformis  
Pemphigus  
Chronic atrophic gastritis  
Pancreatitis  
Acute nephritis  
Chronic osteoarthritis  
Diverticulitis

***Autoantibodies not Detectable***

Rheumatic fever  
Sarcoidosis  
Reiter disease  
Crohn disease  
Ulcerative colitis  
Ankylosing spondylitis  
Polymyalgia rheumatica  
Psoriasis  
Behcet disease  
Giant cell arteritis  
Vitiligo  
Aplastic anemia
